# Supplementary material for: PET image-guided kidney injury theranostics enabled by a bipyramidal DNA framework
Source: Royal Society of Chemistry journal article supplement (doi:10.1039/d3bm01575k), 2024-01-01
Supplement: d3bm01575k1.pdf [file d3bm01575k1.pdf]

**Electronic Supplementary Information for**

**PET image-guided kidney injury theranostics enabled by**

**bipyramidal DNA framework**

Pinghui Li,<sup>a</sup> Zhidie Huang,<sup>a</sup> Xiaoyan Duan,<sup>b,c</sup> Tao Wang,<sup>b,c</sup> Shaowen Yang,<sup>d,e</sup> Dawei Jiang<sup>\*d,e</sup> and Jianbo Li<sup>\*b,c</sup>

- a. Inner Mongolia Medical University, Hohhot 010050, China.
- b. Department of Nuclear Medicine, The Affiliated Hospital of Inner Mongolia Medical University, Hohhot 010050, China. E-mail: lijianbo\_1235@msn.cn
- c. Inner Mongolia Key Laboratory of Molecular Imaging, Hohhot 010050, China.
- d. Department of Nuclear Medicine, Union Hospital, Tongji Medical College, Huazhong University of Science and Technology, Wuhan 430022, China. E-mail: daweijiang@hust.edu.cn
- e. Hubei Province Key Laboratory of Molecular Imaging, Wuhan 430022, China.

| Oligonucleotide | Sequence                                                                       |
|-----------------|--------------------------------------------------------------------------------|
| a               | TTTTTTTTTTTTTTTTTTCTAAGTCTGAAATTATCACCCGCCATAGTAGCGTATCACCAGGCAGTTGAGCGAACATTC |
| b               | TTTTTTTTTTTTTTTTTTCTTGCTACACGCTCAGACTTAGGAATGTTCCATGCGAGGGTCCAATACCGCGATTACAG  |
| c               | GGTGATAAACTGTAGCAAGCTGTAATCCCGGGAAGAGCATGCCCATCCCTACTATGGCG                    |
| A               | TTTTTTTTTTTTTTTTTTCTGCGGGATGCTCAACTGCTGGTGATACCTCTAGTCTCTACGTCAAGTAAAGACCTTAG  |
| B               | CCTGCGATGCATCCGGCAGCTAAGGTTCAAGTTCTGCGGCTTCACGGCGGTATTGGAC                     |
| C               | CTCTCCCGCGTGAAGCGGCAGGAACCTTFACTTGACGTAGAGACTAGAGGATGGGCATG                    |
| NOTA-A20        | NOTA-AAAAAAAAAAAAAAAAAAAAA                                                     |
| Cy5-A20         | Cy5-AAAAAAAAAAAAAAAAAAAAA                                                      |

Table S1. The sequence information (from 5' to 3') of the oligonucleotide single strands used in the study.

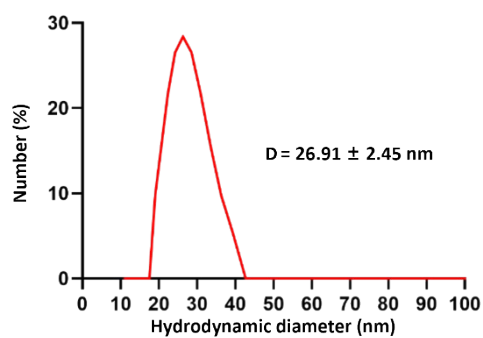

Figure S1. DLS analysis of BDF.

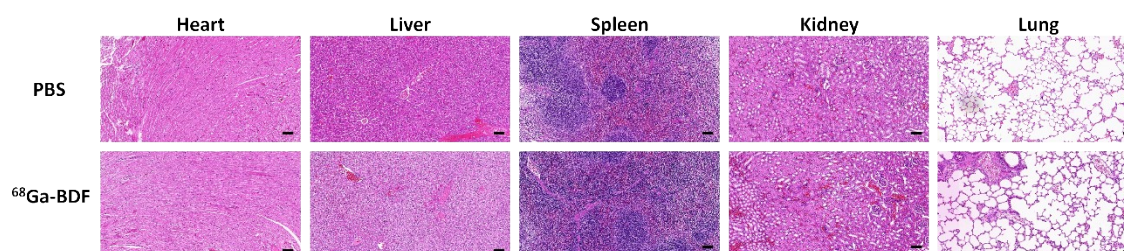

Figure S2. H&E staining results of major organs (heart, liver, spleen, kidney and lung) collected from mice treated with  $^{68}\text{Ga}$ -BDF or PBS. Scale bar = 50  $\mu\text{m}$ .

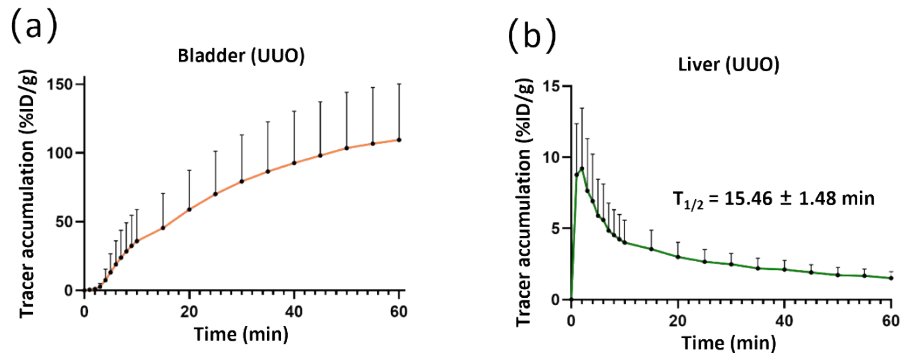

Figure S3. TAC of bladder (a) and liver (b) in UUO model.

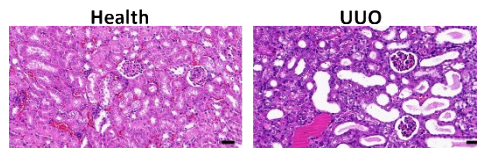

Figure S4. H&E staining results of kidneys in healthy and UUO model. Scale bar = 20  $\mu\text{m}$ .

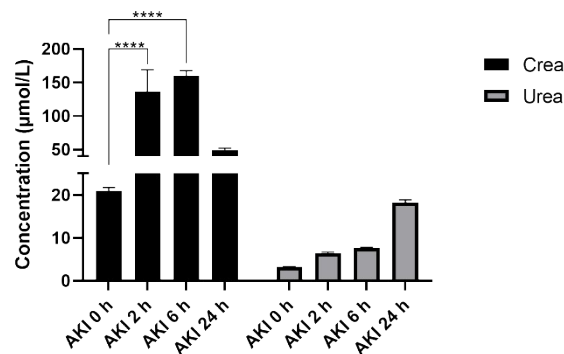

Figure S5. Serum creatinine and urea nitrogen levels in plasma at 0, 2, 6 and 24 h after 50% glycerol injection (n=3). \*\*\*\* $p < 0.0001$

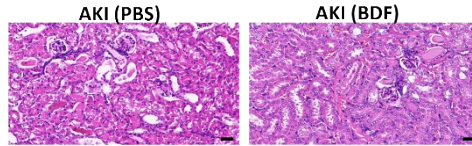

Figure S6. H&E staining results of kidneys in AKI model mice after treatment with PBS or BDF. Scale bar= 20  $\mu\text{m}$ .

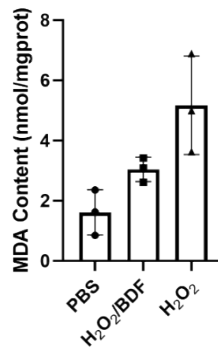

Figure S7. MDA content of HEK293 cells after incubating with PBS, H<sub>2</sub>O<sub>2</sub>/BDF or H<sub>2</sub>O<sub>2</sub>.
